# Supplementary material for: Indexing Baselines: Determining Physiological Stress in Rescued Orphaned Koala Joeys Under Rehabilitation by Comparing Faecal Cortisol Levels Between Healthy and Impaired Individuals
Source: Preprints.org preprint supplement (doi:10.20944/preprints202110.0173.v1), 2021-10-12
Supplement: Supplementary file 1 [file supplementary]

## Sheet: Clinical data
Individual	Date	Body weight/ condtion	Behaviour	Health	Medical intervention
MRRJ	2019-04-02	Gained weight.		Eyes slightly inflamed, corneas clear. Normal heart rate and chest sounds. No ropey gut.
	2019-04-23	Gained weight (50gms)	Bright and alert	No ropey gut	2 week terramycin
	2019-05-16	No weight gain	Bright and alert	No ropey gut. Good quality faeces
	2019-06-18	1.905 kg.	Bright & alert. Moving well.	Regrowth of fur.
	2019-07-02	No more weight gain	Bright & alert.	No ropey gut
	2019-07-16		Bright & alert.	Occasional skip in heart-beat.
KSK	2019-09-09	Fair condition. Weight: 275 grams.		L hand has scabby lesions; fur loss on digits with a strong fungal smell. Fur loss around R & L eyes.	Fungafite cream 3 times a day, plus normal feeding regime
	2019-09-19	Weight gain		Crust all over body, moderately itchy. Skin scrape = Mites -ve. Skin cytology = -ve microrganisms	Malaseb bath every 2 days
	2019-09-20			No lesions around eyes, hands and feet. Multiple scaley lesions on upper dorsal area.	Malaseb bath next week
	2019-10-02			Matted fur on lesions on back.	Malaseb bath
	2019-10-04	Weight gain			Bathed in warm water and malaseb, then rinsed.
	2019-10-11				Bathed in warm water and malaseb, then rinsed.
	2019-10-23			New fur on face. Small amount of dry skin on dorsal fur.	Stop treatment
	2019-11-20	Weight gain		Excellent return of fur to fungal affected areas.
	2020-04-01		Unwell overnight. Not taking formula. Gagging and dribbling.	Died early AM. Abdomen distended. Small, dry, hard faeces. Possible blockage of stomach. Small intestine filled with gas & huge in size
SC	?0/12/19	Healthy good condition.		Coat brown & dry. Eyes clean, bottom dry. L hindleg swollen, possible fracture.	0.4ml Tramadol
	?4/12/19			Left hindlimb femoral fracture	Given IV under GA, intubated and maintained is isolation. Type I external fixator applied with 2 half pins in each segment. Plan: leave on for 8 weeks, then x-ray to assess healing
	2020-01-02	Weight gain
	?/2/20			Upper limb is swollen and seems painful.	Plan: GA and x-ray in next couple of days
	?/2/20			Good progression of bone healing with incorporation of all fracture fragments in fracture callus.	Given alfaxan injection. Lateral and anteroposterior radiographs taken. External fixation removed. It has reduced rate of flexion in stifle. Physio to improve degree of flexion over time.
KCT	2019-01-09		Curled up low in tree.	Covered in dried blood. Covered in engorged ticks.	Advantix, 0.3ml iron, 0.3ml vit B, & fluids
WE	2019-03-11	Fair		Right Eye-> Red, swollen eyelid, crusty discharge, Chalmydia +ve. Conjuctivitis Distended abdomen	Terramycin AM/PM
	2019-03-18		Quiet behaviour; Blepharism	Right eye-> Tender Bloated abdomen	Ineffective administration of terramycin
	2019-03-19		Squinting eye	Conjuctivitis improved	0.2ml Zoletil
	2019-04-04	3.14kg	Squinting eye		0.25ml Zoletil; flushed eye with dilute saline

## Sheet: All joeys
Joey Name	MRRJ	KSK	P	KCT	WE	DG	SC
1	14.9249	25.1901	14.6724	21.0229	42.9068	46.1137	55.1026																						Koala name	Count	Minimum	Maximum	Average	CV	SD	2SD	Peak	Baseline
2	16.0891	10.8403	16.1641	13.217	35.3743																								MRRJ	59	7.50215	37.8037	14.8435	29.2213	5.40567	10.8113	25.6548	14.1139
3	17.8089	17.2034	12.9901	16.0217																									KSK	40	7.94582	43.4185	15.7641	38.2856	6.18754	12.3751	28.1392	15.055
4	12.9742	17.6724	17.2034	27.8101																									P	13	12.3339	20.636	15.9855	5.55414	2.35672	4.71345	20.6989	15.9855
5	13.8548	14.4181	19.1726	26.1979																									KCT	7	13.217	54.3781	28.1255	202.391	14.2264	28.4529	56.5784	23.7501
6	13.4066	14.1686	20.636	38.231																									WE	2	35.3743	42.9068	39.1406	28.369	5.32626	10.6525	49.7931	39.1406
7	15.3019	9.94771	15.6027	54.3781																									DG	1	46.1137	46.1137	46.1137	N/A	N/A	N/A	N/A	46.1137
8	13.4066	7.94582	13.8033																										SC	1	55.1026	55.1026	55.1026	N/A	N/A	N/A	N/A	55.1026
9	19.2436	10.8403	12.3339
10	17.0673	9.69435	14.6724
11	21.3836	13.8033	16.7488
12	17.6576	10.8403	16.4535																										Anova: Single Factor
13	11.0227	13.4482	17.3581
14	11.7638	12.019																											SUMMARY
15	17.8089	14.0457																											Groups	Count	Sum	Average	Variance
16	23.1875	9.6113																											MRRJ	59	875.766	14.8435	29.2213
17	16.2247	11.0282																											KSK	40	630.564	15.7641	38.2856
18	19.5812	11.5126																											P	13	207.811	15.9855	5.55414
19	15.5593	15.3303																											KCT	7	196.879	28.1255	202.391
20	14.8015	16.8988																											WE	2	78.2812	39.1406	28.369
21	8.70348	16.3081																											DG	1	46.1137	46.1137	#DIV/0!
22	7.50215	9.6113																											SC	1	55.1026	55.1026	#DIV/0!
23	13.4066	14.4181
24	13.6287	13.3321
25	12.7636	10.0336																											ANOVA
26	13.4066	14.1686																											Source of Variation	SS	df	MS	F	P-value	F crit
27	14.6793	14.0457																											Between Groups	4495.12	6	749.187	19.3238	1.61023e-15	2.17769
28	15.0494	19.3485																											Within Groups	4497.34	116	38.7702
29	10.6701	16.1641
30	11.7638	16.0217																											Total	8992.47	122
31	10.845	16.3081
32	15.9547	13.6838
33	10.845	18.4879
34	16.2247	20.0719
35	15.175	22.8791
36	18.7504	22.8791
37	12.3534	21.2197
38	10.5837	43.4185
39	14.4383	22.8791
40	25.9105	18.8265
41	16.0891
42	14.6793
43	13.5172
44	13.7412
45	8.84717
46	9.99826
47	11.957
48	11.5739
49	20.1014
50	13.7412
51	10.4131
52	13.2971
53	12.0548
54	9.52167
55	7.69152
56	7.69152
57	33.4685
58	13.8548
59	37.8037
SD	5.40567	6.18754	2.35672	14.2264	5.32626	N/A	N/A
2SD	10.8113	12.3751	4.71345	28.4529	10.6525	N/A	N/A
Peak	25.6548	28.1392	20.6989	56.5784	49.7931	N/A	N/A
Baseline	14.1139	15.055	15.9855	23.7501	39.1406	N/A	N/A
Min	7.50215	7.94582	12.3339	13.217	35.3743	46.1137	55.1026
Max	37.8037	43.4185	20.636	54.3781	42.9068	46.1137	55.1026
Average	14.8435	15.7641	15.9855	28.1255	39.1406	55.1026	46.1137

## Sheet: MRRJ variation
June	July
14.9249	14.4383			Anova: Single Factor
16.0891	25.9105
17.8089	16.0891			SUMMARY
12.9742	14.6793			Groups	Count	Sum	Average	Variance
13.8548	13.5172			June	33	482.287	14.6148	11.9222
13.4066	13.7412			July	21	320.391	15.2567	63.3191
15.3019	8.84717
13.4066	9.99826
19.2436	11.957			ANOVA
17.0673	11.5739			Source of Variation	SS	df	MS	F	P-value	F crit
21.3836	20.1014			Between Groups	5.2887	1	5.2887	0.166887	0.68457	4.02663
17.6576	13.7412			Within Groups	1647.89	52	31.6902
11.0227	10.4131
11.7638	13.2971			Total	1653.18	53
17.8089	12.0548
23.1875	9.52167
16.2247	7.69152
19.5812	7.69152
15.5593	33.4685
14.8015	13.8548
8.70348	37.8037
7.50215
13.4066
13.6287
12.7636
13.4066
14.6793
15.0494
10.6701
11.7638
10.845
15.9547
10.845
16.2247
15.175
18.7504
12.3534
10.5837

## Sheet: KSK variation
September	October	November		Anova: Single Factor
25.1901	11.5126	20.0719
10.8403	15.3303	22.8791		SUMMARY
17.2034	16.8988	22.8791		Groups	Count	Sum	Average	Variance
17.6724	16.3081	21.2197		September	17	222.717	13.101	16.8347
14.4181	9.6113	43.4185		October	16	235.673	14.7296	7.45069
14.1686	14.4181	22.8791		November	7	172.174	24.5963	71.3807
9.94771	13.3321	18.8265
7.94582	10.0336
10.8403	14.1686			ANOVA
9.69435	14.0457			Source of Variation	SS	df	MS	F	P-value	F crit
13.8033	19.3485			Between Groups	683.74	2	341.87	15.6279	1.2027e-05	3.25192
10.8403	16.1641			Within Groups	809.399	37	21.8757
13.4482	16.0217
12.019	16.3081			Total	1493.14	39
14.0457	13.6838
9.6113	18.4879
11.0282
